# Supplementary material for: An ultrasensitive fluorometric platform for S1 nuclease assay based on cytochrome c
Source: Royal Society of Chemistry journal article supplement (doi:10.1039/c4ra05088f), 2014-01-01
Supplement: c4ra05088f1.pdf [file c4ra05088f1.pdf]

## **Electronic supplementary information**

### **An ultrasensitive fluorometric platform for S1 nuclease assay based on cytochrome c**

Yue He\* and Bining Jiao\*

\* To whom correspondence should be addressed. Dr. Yue He, E-mail: [yhe@swu.edu.cn](mailto:yhe@swu.edu.cn), Tel: 86-23-68349603, Fax: 86-23-68349603; Pro. Bining Jiao, E-mail: [jiaobining@cric.cn](mailto:jiaobining@cric.cn), Tel: 86-23-68349603, Fax: 86-23-68349603

\*Corresponding author:

Laboratory of Quality & Safety Risk Assessment for Citrus Products (Chongqing), Ministry of Agriculture, Citrus Research Institute, Southwest University, Chongqing, 400712, China; National Citrus Engineering Research Center, Chongqing, 400712, China.

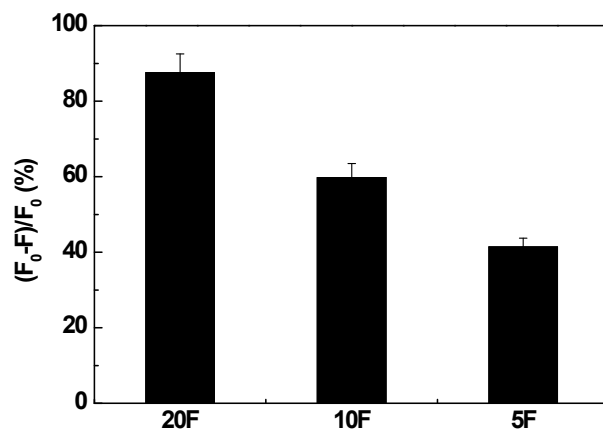

Fig. S1 Comparison of the fluorescence quenching efficiency of *Cyt c* to ssDNA with different lengths. The 5F, 10F, and 20F, denote FAM-labeled ssDNA containing 5, 10, and 20 bases, respectively. Concentration: 5F, 40 nM; 10F, 40 nM; 20F, 40 nM; *Cyt c*, 0.16  $\mu$ M. Excitation: 480 nm.

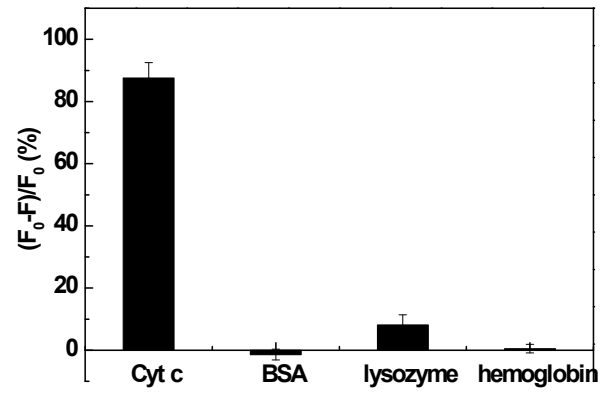

Fig. S2 Comparison of the fluorescence quenching efficiency of different proteins to 20F. Concentration: 20F, 40 nM; *Cyt c*, 0.16  $\mu$ M; BSA, 0.16  $\mu$ M; lysozyme, 0.16  $\mu$ M; hemoglobin, 0.16  $\mu$ M. Excitation: 480 nm.

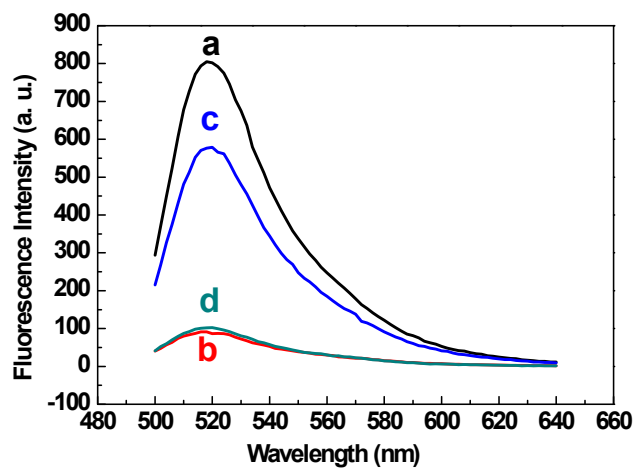

Fig. S3 Fluorescence emission spectra of 20F under different conditions: (a) 20F; (b) 20F + *Cyt c*; (c) 20F + S1 nuclease (with  $Zn^{2+}$ ) + *Cyt c*; (d) 20F + S1 nuclease (without  $Zn^{2+}$ ) + *Cyt c*. Concentration: 20F, 40 nM; *Cyt c*, 0.16  $\mu$ M; S1 nuclease,  $3.2 \times 10^{-2}$  units/mL,  $Zn^{2+}$ , 2 mM. Excitation: 480 nm.

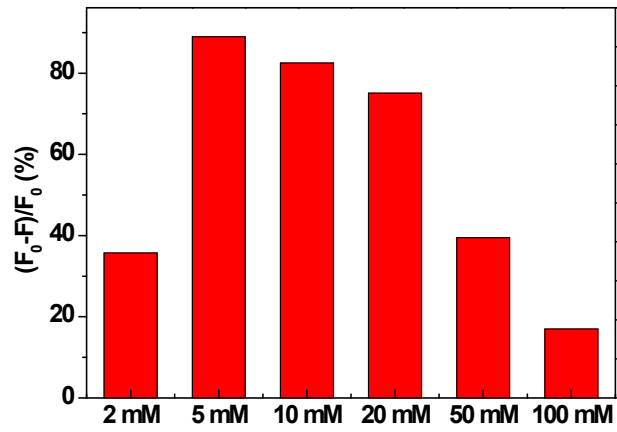

Fig. S4 Comparison of the fluorescence quenching efficiency of *Cyt c* to 20F in different concentration of Tris-HCl buffer. Concentration: 20F, 40 nM; *Cyt c*, 0.16  $\mu$ M. Excitation: 480 nm.

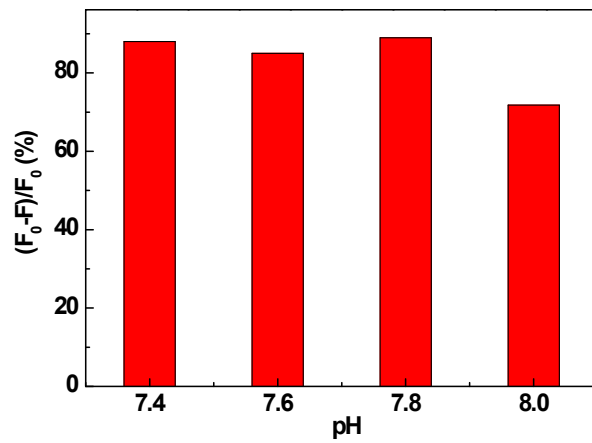

Fig. S5 Comparison of the fluorescence quenching efficiency of *Cyt c* to 20F in different pH value of Tris-HCl buffer. Concentration: Tris-HCl, 5 mM; 20F, 40 nM; *Cyt c*, 0.16  $\mu$ M. Excitation: 480 nm.

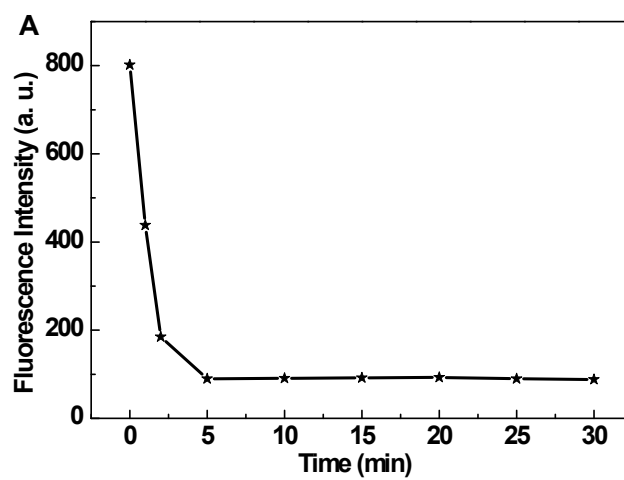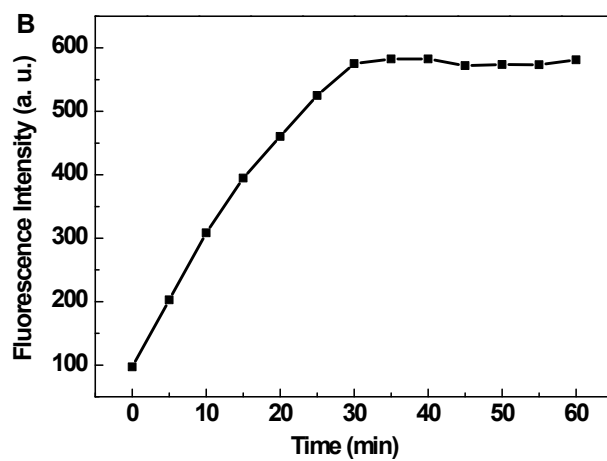

Fig. S6 (A) Fluorescence quenching of 20F in Tris-HCl buffer by *Cyt c* as a function of time. (B) Fluorescence increasing of the biosensor by S1 nuclease as a function of time. Concentration: 20F, 40 nM; *Cyt c*, 0.16  $\mu$ M; S1 nuclease,  $3.2 \times 10^{-2}$  units/mL. Excitation: 480 nm.

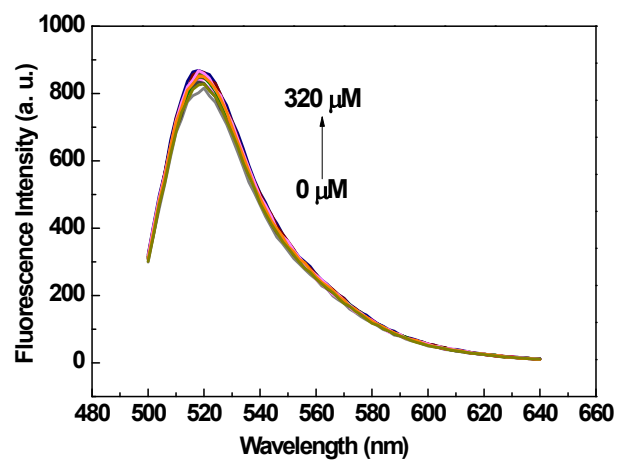

Fig. S7 Fluorescence emission spectra of 20F in the presence of increasing amount of ATP.  
Concentration: 20F, 40 nM. Excitation: 480 nm.



Table S1. Proteins studied in the current investigation.

| Protein                       | Molar mass (kDa) | pI        |
|-------------------------------|------------------|-----------|
| Cytochrome c ( <i>Cyt c</i> ) | 12.2             | 10.0-10.5 |
| Bovine serum albumin (BSA)    | 66               | 4.7       |
| Lysozyme                      | 14.3             | 11.0      |
| Hemoglobin                    | 64.5             | 6.8       |
